# Supplementary material for: Low-temperature architecture of a cubic-phase CsPbBr3 single crystal for ultrasensitive weak-light photodetectors
Source: Royal Society of Chemistry journal article supplement (doi:10.1039/d1cc03460j), 2021-01-01
Supplement: d1cc03460j1.pdf [file d1cc03460j1.pdf]

## Electronic Supplementary Information

# Low-temperature architecture of cubic-phase CsPbBr<sub>3</sub> single crystal for ultrasensitive weak-light photodetector

*Xiangfeng Wei,<sup>a,†</sup> Han Liu,<sup>a,†</sup> Zhixiang Zhang,<sup>b</sup> Wenchao Xu,<sup>a</sup> Wenjun Huang,<sup>a</sup> Lin-Bao Luo,<sup>b,\*</sup>  
and Jiehua Liu<sup>a,c,\*</sup>*

<sup>a</sup> Future Energy Laboratory, School of Materials Science and Engineering, Hefei University of Technology, Hefei, 230009, China

<sup>b</sup> School of Electronic Science and Applied Physics, Hefei University of Technology, Hefei, 230009, China

<sup>c</sup> Key Laboratory of Advanced Functional Materials and Devices of Anhui Province, Hefei, 230009, China

### AUTHOR INFORMATION

#### Corresponding Author

\* liujh@hfut.edu.cn, luolb@hfut.edu.cn

†X. Wei and H. Liu contributed equally.

## **Experimental Section**

### **1. Preparation of precursor solution**

The saturated solubility of CsBr or PbBr<sub>2</sub> was firstly investigated in the DMSO solution with excess CsBr or PbBr<sub>2</sub> by increasing temperature from 40 to 60 °C. The saturated solubility of CsBr or PbBr<sub>2</sub> in H<sub>2</sub>O and DMSO mixed solution was measured by drying 0.5 g saturated solution at 100 °C for 0.5 hours. The saturated solubility was also investigated in mixed H<sub>2</sub>O and DMSO solution with different mass ratios (0 to 50% of H<sub>2</sub>O/(H<sub>2</sub>O + DMSO)). Saturation solubility of CsBr and PbBr<sub>2</sub> with an equal molar quantity was confirmed as shown in Table S1. The solution was placed at a constant temperature of 60 °C for 6 h and then filtered with a 0.22 μm nylon filter. The filtered solution was then placed in a sample bottle and sealed for future use.

### **2. CsPbBr<sub>3</sub> single crystal growth**

The anti-solvent and co-solvent method was used to realize the growth of single crystal at low temperature. First of all, the above DMSO/H<sub>2</sub>O solution has a 1:1 ratio of CsBr/PbBr<sub>2</sub> was titrated by acetonitrile as the anti-solvent to saturation. The proportion of the solution and acetonitrile is 1: 0.09 to make sure that the solution is closed to saturation. The solution was added to a small glass bottle. Then it was put into a big bottle with acetonitrile. After sealed, the bottles were put into an oven at 35 °C and then heating with a rate of 0.3 °C/h to 46 °C. The obtained orange single crystal was dried for physical characterization and testing.

### **3. Fabrication of photodetector**

Au/CsPbBr<sub>3</sub>/Au photodetectors were fabricated on (100) facet of cubic CsPbBr<sub>3</sub> single crystals. Au electrodes with a width of 14 μm were evaporated on the crystal surface when using a mask plate made of Ag micro-wire with a diameter of 10 μm by thermal evaporation.

### **4. Characterizations**

X-ray diffraction (XRD) patterns were measured with X' Pert PRO MPD X-ray diffractometer using Cu K<sub>α</sub> radiation at 40 kV and 40 mA. Here, both powder and single crystals XRD were characterized. A field emission scanning electron

microscope (SEM, HITACHI UHR FE-SEM SU8020) was used to obtain SEM images of the concave surface. The steady-state photoluminescence measurements were acquired with an Edinburgh FLS920 fluorescence spectrometer at an excitation wavelength of 490 nm. UV-Vis spectrum was measured on Agilent. UV-Vis spectrophotometer (CARY 5000) with an integrating sphere over the spectral range of 300-800 nm.

Time-resolved photoluminescence (TRPL) spectra were obtained by using the time-correlated single-photon counting technique (TimeHarp 260), and the excitation was provided by a picosecond diode laser (PicoQuant) at the wavelength of 510 nm. The photoluminescence intensity decay curve was fitted with a double exponential decay equation as follows:

$$I(t) = A_1 \exp\left(-\frac{t}{\tau_1}\right) + A_2 \exp\left(-\frac{t}{\tau_2}\right) \quad (1)$$

In this function,  $I$  is the decaying intensity,  $A_1$  and  $A_2$  are the decay amplitude and  $\tau_1$  and  $\tau_2$  are the fitted decay lifetimes of which the small constant  $\tau_1$  is ascribed to recombination due to surface traps and the large time constant  $\tau_2$  to the bulk traps. The average lifetime was determined as follows:

$$\tau_{av} = \frac{A_1\tau_1^2 + A_2\tau_2^2}{A_1\tau_1 + A_2\tau_2} \quad (2)$$

The optoelectronic characterization of the single-crystal photodetectors was carried out at room temperature with a semiconductor characterization system (Keithley 4200-SCS), using a laser diode (520 nm) as the illumination source. The power intensity of the incident light was calibrated by a power meter (Thorlabs GmbH., PM100D). To further understand the photoelectric performance of the device, we determined the responsivity ( $R$ ), external quantum efficiency (EQE), and detectivity ( $D^*$ ) which are three key parameters for photodetectors. Responsivity represents the ratio of photon-excited current to irradiation flux. EQEs can be obtained from responsivity by changing the ratio of current/incident light power to electron quantity/photon quantity to evaluate the photocurrent conversion ability of our devices on different lattice planes.  $D^*$  is the parameter that characterizes the sensitivity of the detector. The equations are shown below:

$$R = \frac{I_{pc} - I_{dark}}{P \times S} \quad (3)$$

$$EQE = R \times \frac{hc}{e\lambda} \quad (4)$$

$$D^* = R \times \sqrt{\frac{S}{2q \times I_{dark}}} \quad (5)$$

Where  $I_{pc}$  is the photocurrent under illumination and  $I_{dark}$  is dark current,  $P$  is the irradiance power density, and  $S$  is the effective illuminated area. Then  $c$  stands for the speed of light,  $e$  is the elementary charge, and  $\lambda$  is the wavelength of the light source.

**Table S1. The equal molar solubility of CsBr/PbBr<sub>3</sub> with different H<sub>2</sub>O and DMSO at different temperature**

| Temperature<br>(°C) | DMSO<br>(wt%) | H <sub>2</sub> O<br>(wt%) | Equal molar solubility of<br>CsBr/PbBr <sub>3</sub> (mol/100g) |
|---------------------|---------------|---------------------------|----------------------------------------------------------------|
| 40                  | 61.8          | 38.2                      | 0.056                                                          |
| 45                  | 61.9          | 38.1                      | 0.060                                                          |
| 50                  | 63.2          | 36.8                      | 0.065                                                          |
| 60                  | 72.8          | 27.2                      | 0.111                                                          |

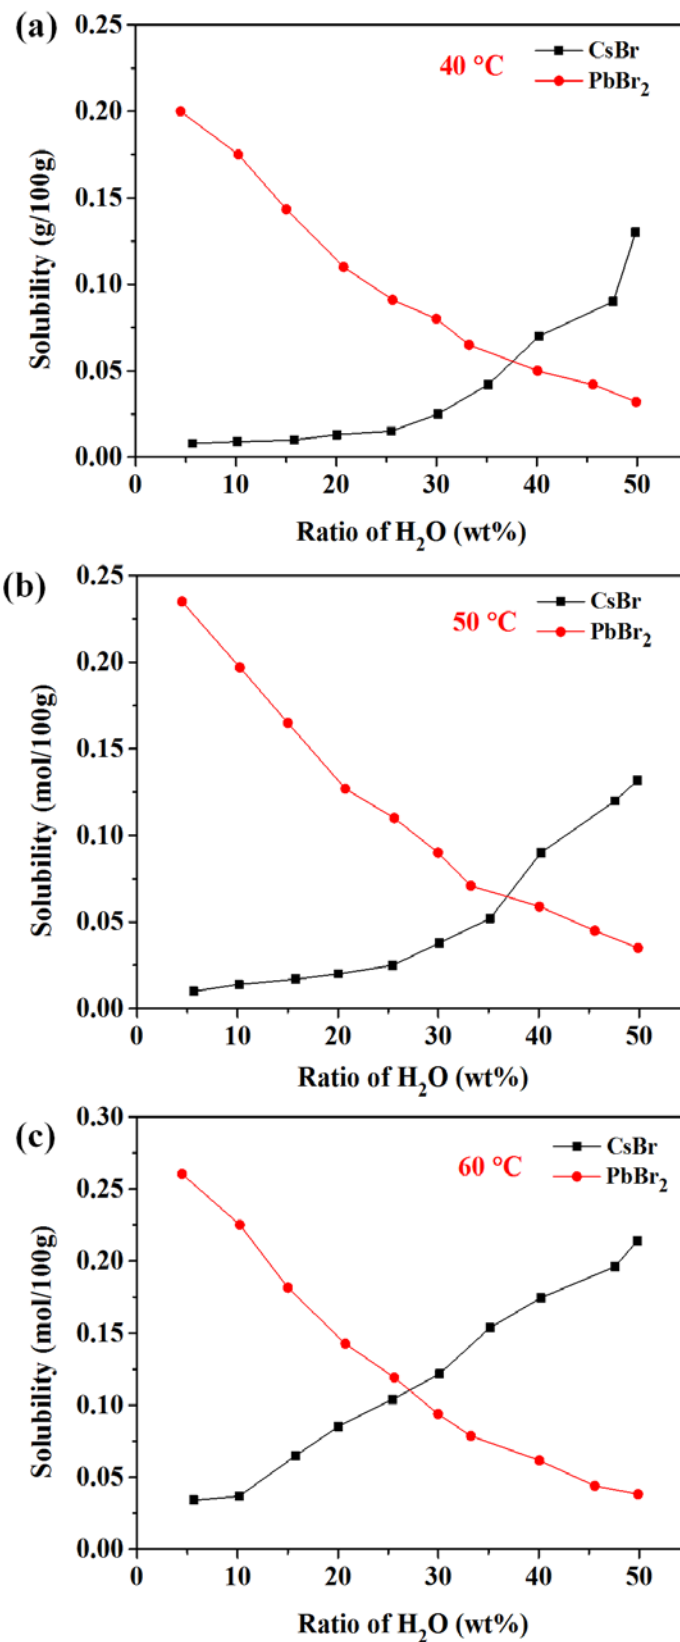

**Figure S1.** The saturation solubility curves of CsBr and PbBr<sub>2</sub> in DMSO-H<sub>2</sub>O solution at 40, 50, and 60 °C.

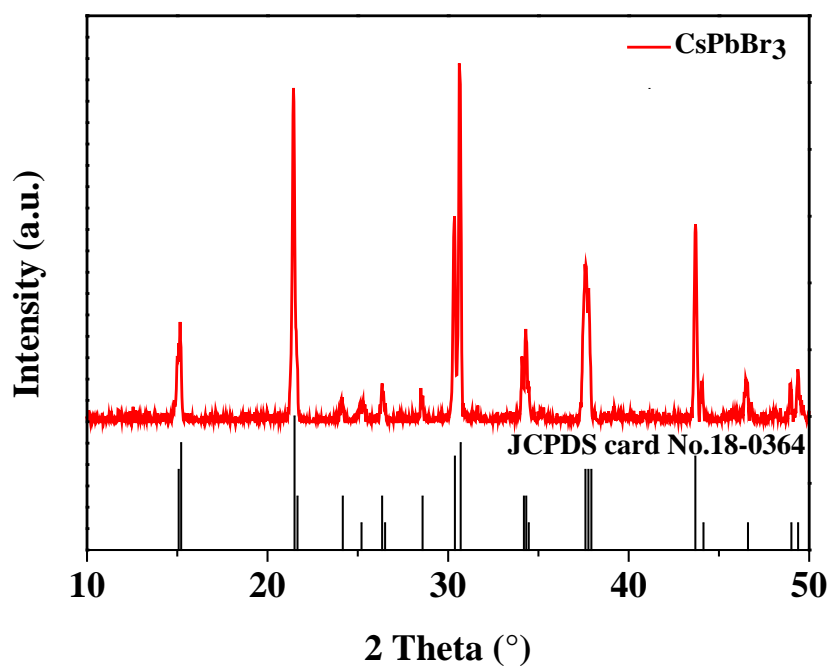

**Figure S2.** Powder XRD pattern of CsPbBr<sub>3</sub>.

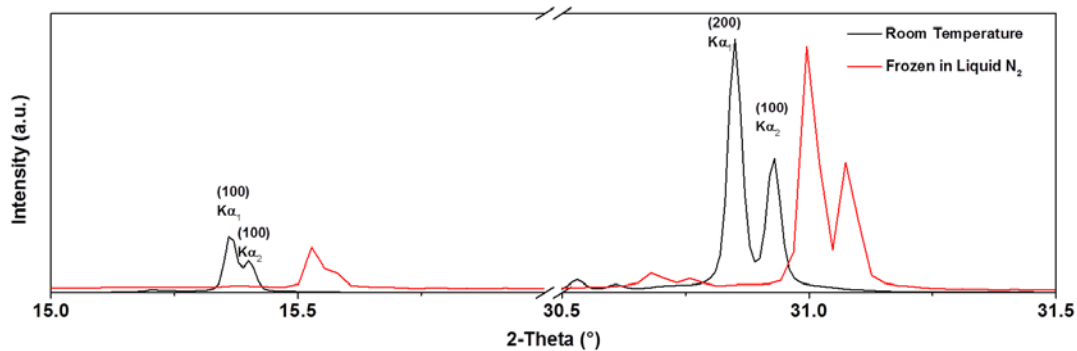

**Figure S3.** XRD patterns of CsPbBr<sub>3</sub> single crystals in high-precision scanning at room temperature and frozen in liquid N<sub>2</sub>. The frozen single crystal was obtained after first put in liquid N<sub>2</sub> for 3 hours and stored at room temperature for 5 hours.

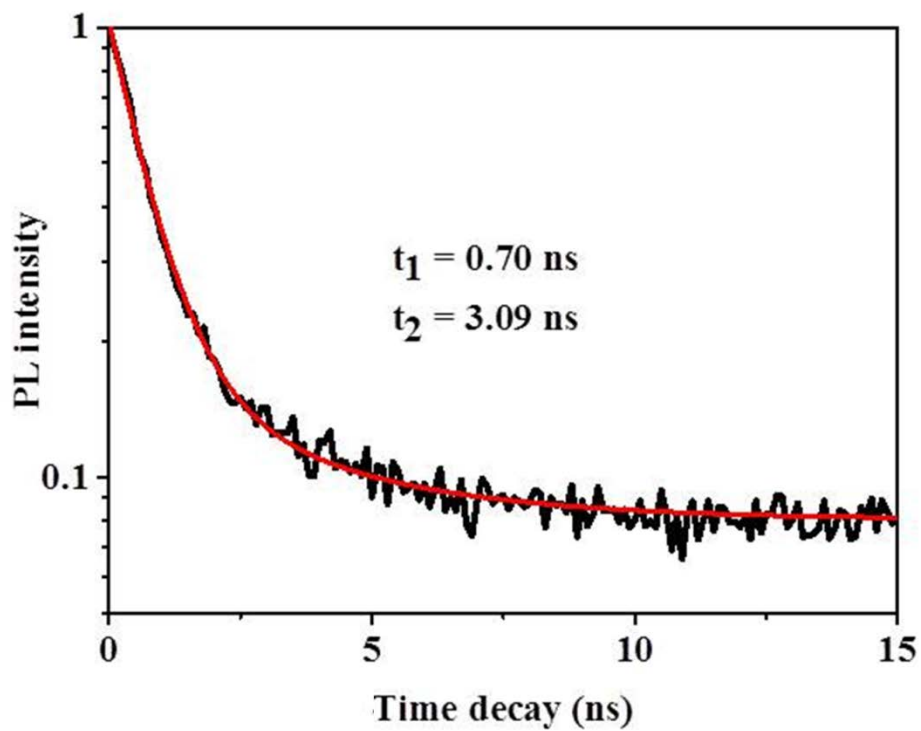

**Figure S4.** Time-resolved steady-state photoluminescence of cubic-phase CsPbBr<sub>3</sub> single crystal.

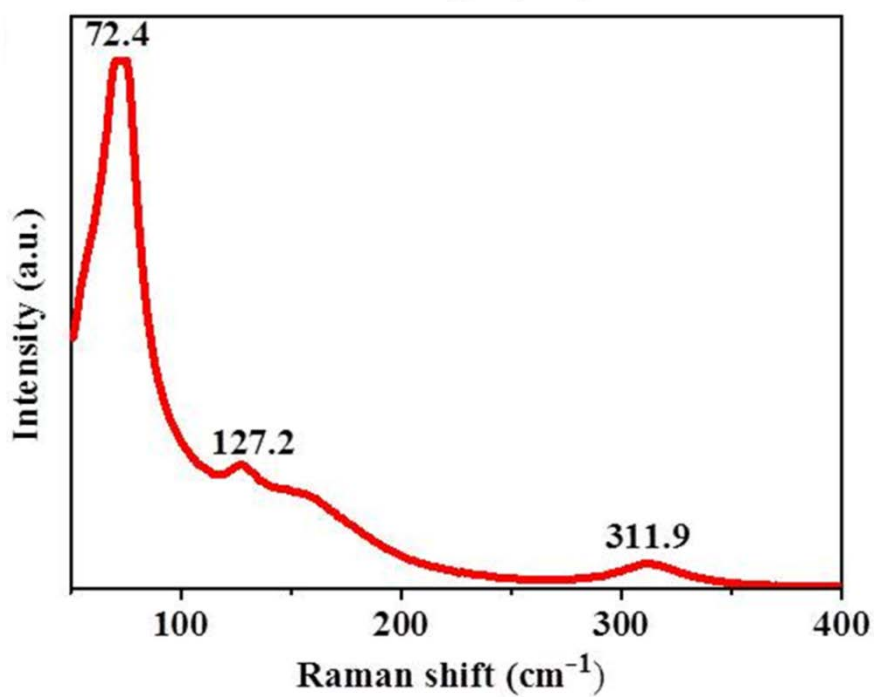

**Figure S5.** Raman spectrum of cubic-phase CsPbBr<sub>3</sub> single crystal.

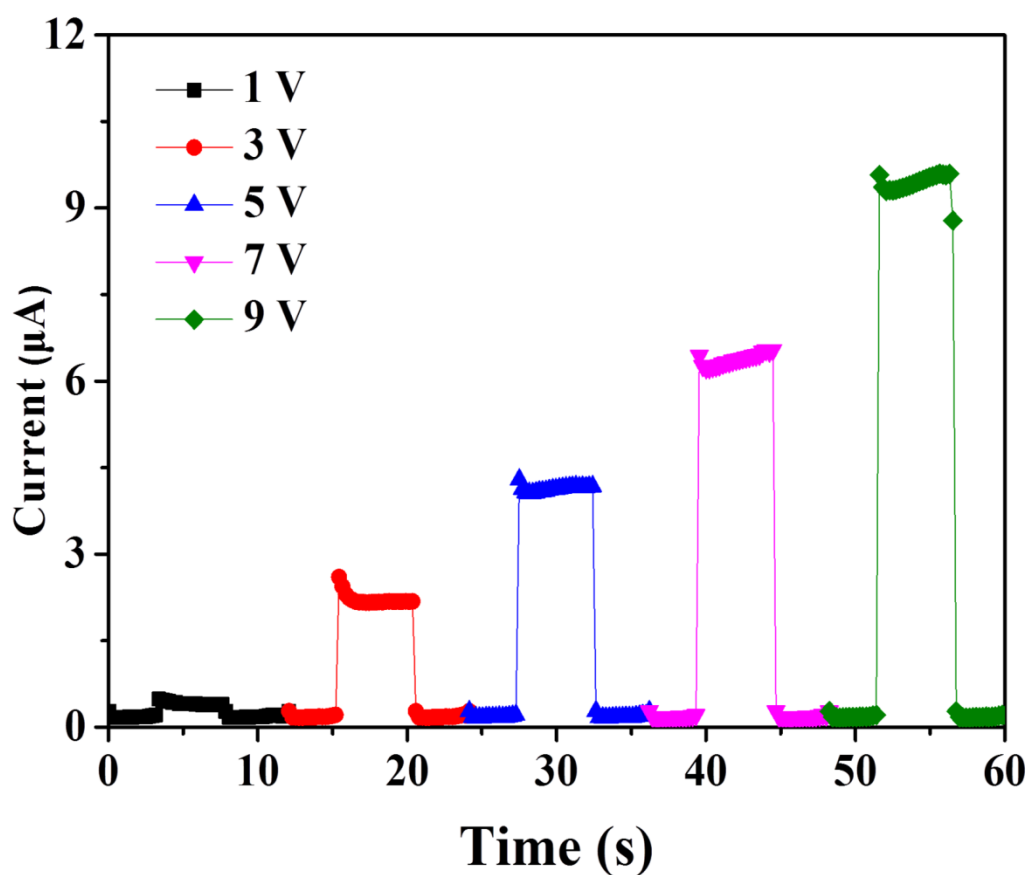

Figure S6. Current curves of the cubic-phase CsPbBr<sub>3</sub> single-crystal photodetector with at 1-9 V.

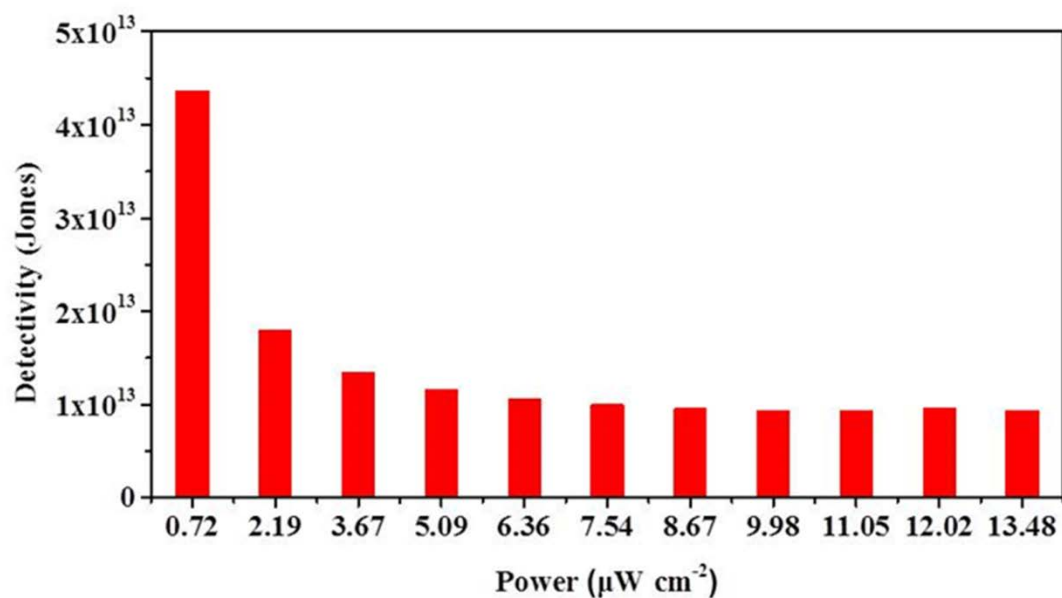

Figure S7. current-light intensity fitting curve for CsPbBr<sub>3</sub> single-crystal photodetector at different light intensities when the bias voltage is 3V and the light wavelength is 520 nm.



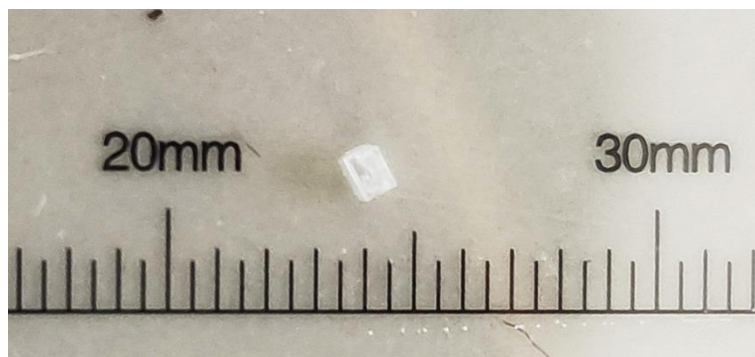

Figure S8. Photograph of CsPbCl<sub>3</sub> single crystal obtained with Cs/Pb of 1:1 in H<sub>2</sub>O/DMSO solution
